# Supplementary material
Source: PubMed Central journal article supplement (PMC4440683)

# supplemental figure 1

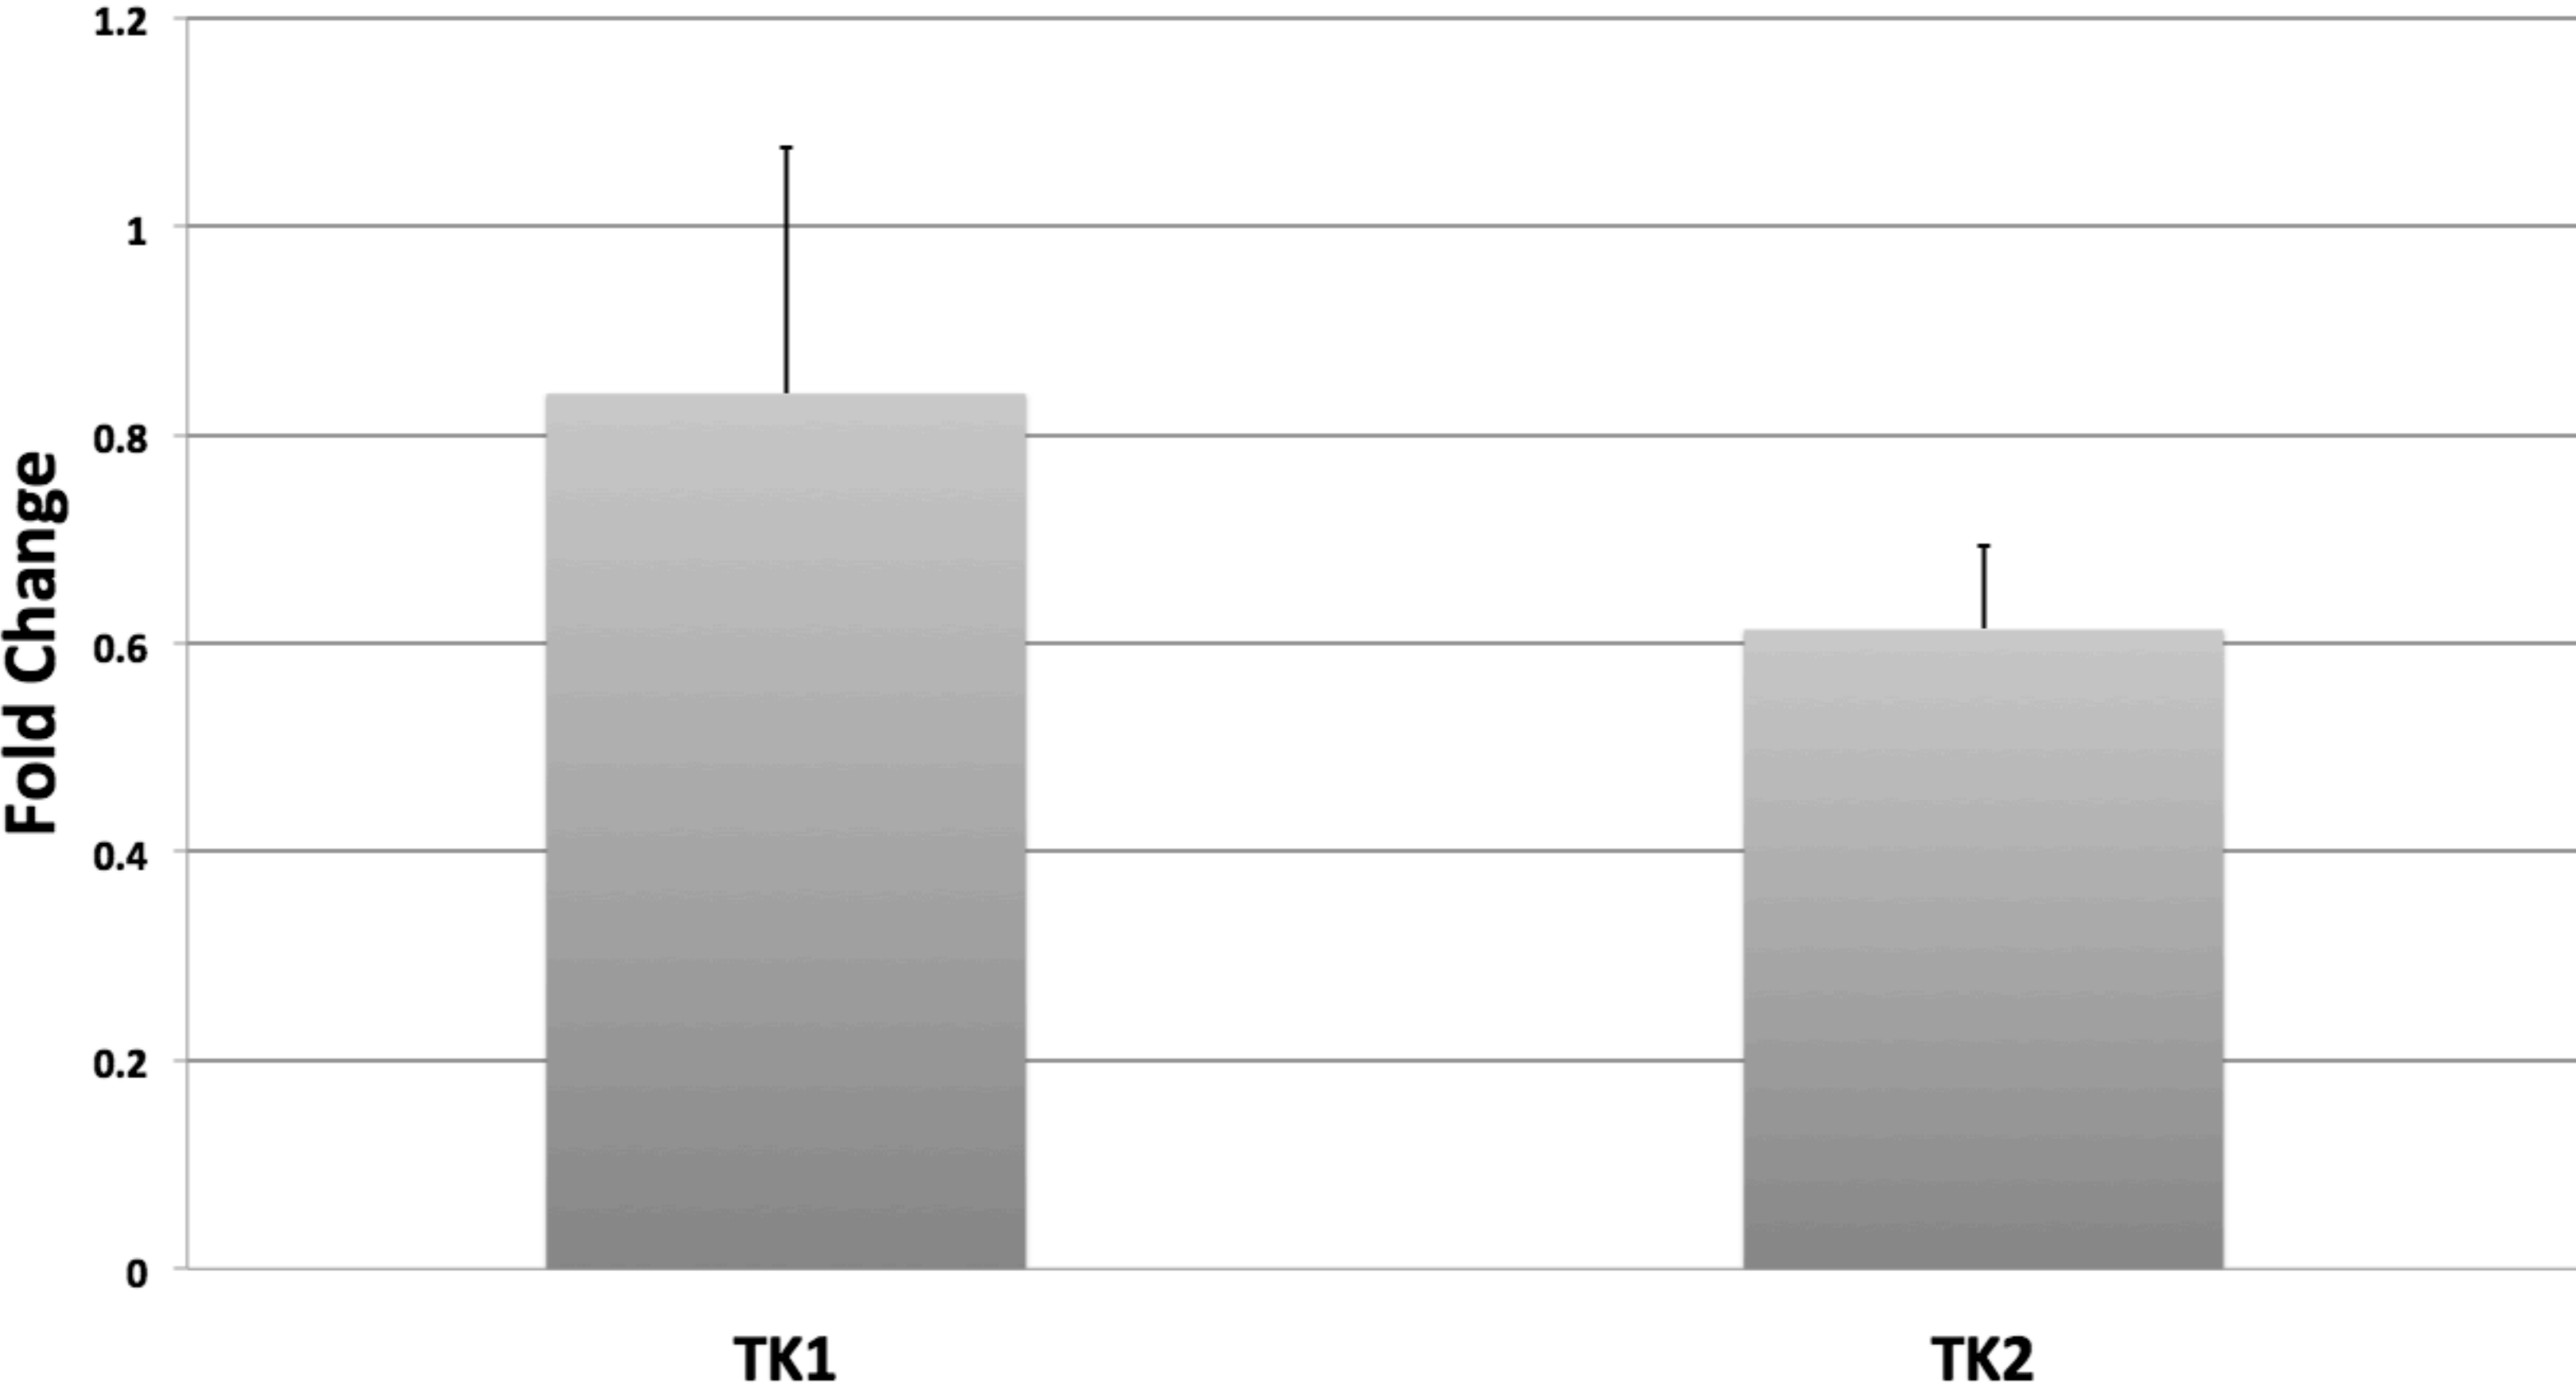

Supplement: NIHMS658307-supplement-Supplementary_Figure_1.pdf [file NIHMS658307-supplement-Supplementary_Figure_1.pdf]
